# Supplementary material
Source: MDPI journal article supplement (https://www.mdpi.com/2076-3417/11/9/4108)
Supplement: s1 [file s1 › applsci-993313-supplementary.pdf]

## Supplementary Materials

### Results of 5 (Ambient Illuminance: 0, 25, 50, 75, and 100 lx) × 6 (Screen Luminance: 3.87, 21.47, 42.74, 64.12, 84.77 and 106.7 cd/m<sup>2</sup>) repeated analysis of variance (ANOVA)

#### S1. Effects of screen luminance and ambient illuminance on subjective evaluations

##### S1.1. Screen brightness

The ANOVA results showed the significant main effects of screen luminance and ambient illuminance [ $F(5, 160) = 133.21, p < .001, \eta^2 = .81$ ;  $F(4, 128) = 15.60, p < .001, \eta^2 = .33$ ], but no significant interaction existed between them [ $F(20, 640) = 1.34, p = .23, \eta^2 = .04$ ]. The main effect of screen luminance revealed a statistically significant difference among the six luminance levels ( $ps < .04$ , except for 84.77 cd/m<sup>2</sup> vs. 106.7 cd/m<sup>2</sup> ( $p = .697$ )). The main effect of ambient illuminance indicated that subjective ratings of screen brightness under 0 lx illuminance were significantly higher than those under other illuminance levels ( $ps = .001$  for 0 lx vs. 25 lx and 0 lx vs. 75 lx;  $ps < .001$  for 0 lx vs. 50 lx and 0 lx vs. 100 lx).

##### S1.2. Visual comfort with screen luminance

The findings of visual comfort showed significant main effect of screen luminance [ $F(5, 160) = 10.81, p < .001, \eta^2 = .25$ ], ambient illuminance [ $F(4, 128) = 16.16, p < .001, \eta^2 = .34$ ] and significant interaction between screen luminance and ambient illuminance [ $F(20, 640) = 6.23, p < .001, \eta^2 = .16$ ] (see Figure S1). Post hoc analyses revealed that when the screen luminance level was 3.87 cd/m<sup>2</sup>, the visual comfort at 75 lx ( $2.42 \pm .75$ ) ( $M \pm SD$ ) was significantly lower than that at 25 lx ( $2.91 \pm .77, p = .031$ ) and 50 lx ( $2.79 \pm .74, p = .031$ ) conditions; when the screen luminance level was 21.47 cd/m<sup>2</sup>, the visual comfort at 100 lx ( $2.24 \pm .71$ ) was significantly lower than that at 0 lx ( $3.03 \pm .73, p < .001$ ), 25 lx ( $3.18 \pm .73, p < .001$ ), 50 lx ( $3.00 \pm .75, p = .001$ ) and 75 lx ( $2.79 \pm .70, p = .007$ ) conditions, the visual comfort at 25 lx was significantly higher than that at the 75 lx condition ( $p = .048$ ); when the screen luminance level was 42.74 cd/m<sup>2</sup>, the visual comfort at 50 lx ( $3.73 \pm .45$ ) was significantly higher than that at 0 lx ( $2.82 \pm 1.01, p = .001$ ), 75 lx ( $3.36 \pm .55, p = .031$ ) and 100 lx ( $3.09 \pm .77, p = .003$ ) conditions, and the visual comfort at 25 lx ( $3.55 \pm .51$ ) was significantly higher than that at the 0 lx condition ( $p = .002$ ); when the screen luminance level was 84.77 cd/m<sup>2</sup>, the visual comfort at 0 lx ( $2.21 \pm .86$ ) was significantly lower than that at 25 lx ( $2.82 \pm .77, p = .001$ ), 50 lx ( $3.21 \pm .74, p < .001$ ), 75 lx ( $3.18 \pm .58, p < .001$ ) and 100 lx ( $3.00 \pm .75, p = .006$ ) conditions; when the screen luminance level was 106.7 cd/m<sup>2</sup>, the visual comfort at 0 lx ( $2.12 \pm .70$ ) was significantly lower than that at 25 lx ( $2.88 \pm .82, p < .001$ ), 50 lx ( $3.27 \pm .52, p < .001$ ), 75 lx ( $3.09 \pm .68, p < .001$ ) and 100 lx ( $2.91 \pm .68, p = .002$ ) conditions.

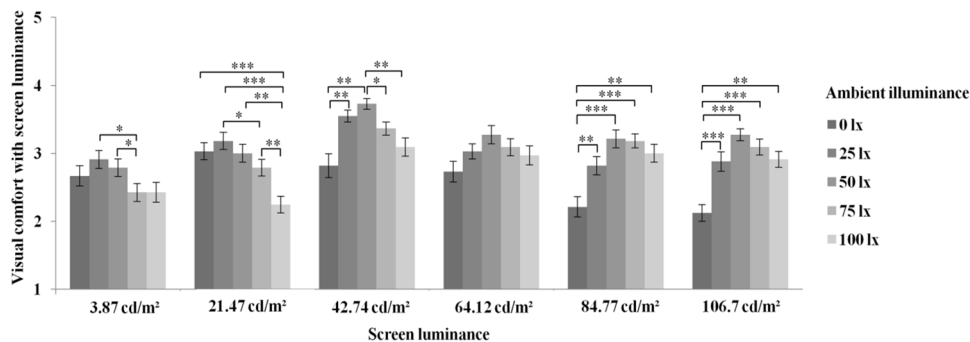

**Figure S1.** Subjective ratings of visual comfort with screen luminance under different ambient illuminance conditions. Error bars indicate  $\pm 1$  standard error of the mean. \*\*\*  $p < .001$ , \*\*  $p < .01$ , \*  $p < .05$ .

### S1.3. Illuminance satisfaction

The main effects of screen luminance [ $F(5, 160) = 4.08, p = .005, \eta^2 = .11$ ] and ambient illuminance [ $F(4, 128) = 11.16, p < .001, \eta^2 = .26$ ] and the interaction between screen luminance and ambient illuminance [ $F(20, 640) = 2.30, p = .013, \eta^2 = .067$ ] were significant for illuminance satisfaction (see Figure S2). Post hoc analyses showed that when the screen luminance level was 3.87 cd/m<sup>2</sup>, satisfaction at 25 lx ( $3.27 \pm .57$ ) was significantly higher than that at 0 lx ( $2.79 \pm .86, p = .021$ ) and 100 lx ( $2.33 \pm 1.05, p = .001$ ) conditions, and satisfaction at 50 lx ( $2.91 \pm .68$ ) was significantly higher than that at 100 lx ( $p = .013$ ); when the screen luminance level was 21.47 cd/m<sup>2</sup>, satisfaction at 100 lx ( $2.61 \pm .79$ ) was significantly lower than that at 50 lx ( $3.19 \pm .73, p = .009$ ) and 75 lx ( $3.00 \pm .83, p = .03$ ) conditions; when the screen luminance level was 42.74 cd/m<sup>2</sup>, satisfaction at 50 lx ( $3.67 \pm .54$ ) was significantly higher than that at 0 lx ( $2.97 \pm .88, p = .002$ ), 75 lx ( $3.00 \pm .83, p < .001$ ) and 100 lx ( $2.58 \pm 1.03, p < .001$ ) conditions, and satisfaction at 100 lx was significantly lower than that at 25 lx ( $3.39 \pm .70, p = .009$ ) and 75 lx ( $p = .043$ ) conditions; when the screen luminance level was 64.12 cd/m<sup>2</sup>, satisfaction at 50 lx ( $3.21 \pm .55$ ) was significantly higher than that at 75 lx ( $2.64 \pm .86, p = .024$ ) and 100 lx ( $2.33 \pm .96, p = .001$ ) conditions, and satisfaction at 25 lx ( $3.18 \pm .68$ ) was significantly higher than that at 100 lx condition ( $p = .006$ ); when the screen luminance level was 84.77 cd/m<sup>2</sup>, satisfaction at 50 lx ( $3.33 \pm .60$ ) was significantly higher than that at 0 lx ( $2.58 \pm .94, p = .002$ ) and 100 lx ( $2.79 \pm .86, p = .021$ ) conditions; when the screen luminance level was 106.7 cd/m<sup>2</sup>, satisfaction at 0 lx ( $2.45 \pm .79$ ) was significantly lower than that at 25 lx ( $3.00 \pm .90, p = .038$ ) and 50 lx ( $3.06 \pm .70, p = .002$ ) conditions.

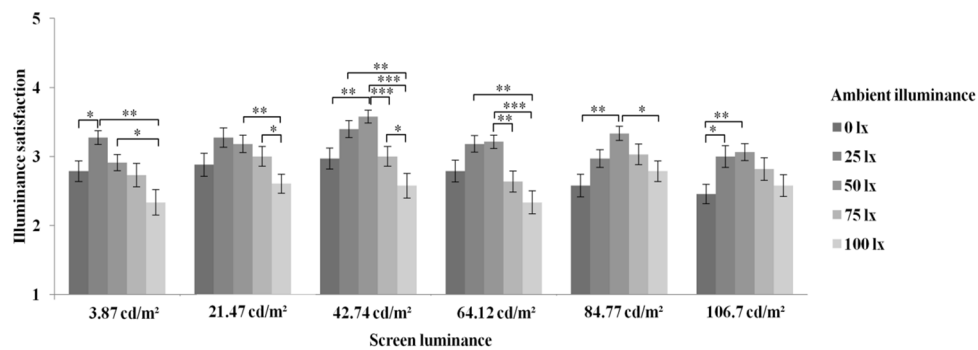

**Figure S2.** Subjective ratings of illuminance satisfaction with different screen luminance conditions. Error bars indicate  $\pm 1$  standard error of the mean. \*\*\*  $p < .001$ , \*\*  $p < .01$ , \*  $p < .05$ .

### S1.4. Visual fatigue

There were significant main effects of screen luminance [ $F(5, 160) = 3.96, p = .007, \eta^2 = .11$ ] and ambient illuminance [ $F(4, 128) = 3.21, p = .046, \eta^2 = .09$ ]. The interaction between screen luminance and ambient illuminance was also significant [ $F(20, 640) = 2.42, p = .011, \eta^2 = .07$ ] (see Figure S3). Post hoc analyses revealed that when the screen luminance level was 84.77 cd/m<sup>2</sup>, the visual fatigue under 50 lx ( $1.85 \pm .67$ ) was significantly lower than that under 0 lx ( $2.48 \pm .83, p = .003$ ) and 25 lx ( $2.24 \pm .71, p = .017$ ) conditions, and visual fatigue under 75 lx ( $1.97 \pm .68$ ) was significantly lower than that under the 0 lx condition ( $p = .026$ ); when the screen luminance level was 106.7 cd/m<sup>2</sup>, the visual fatigue under 50 lx ( $1.97 \pm .68$ ) was significantly lower than that under the 0 lx condition ( $2.42 \pm .90, p = .037$ ).

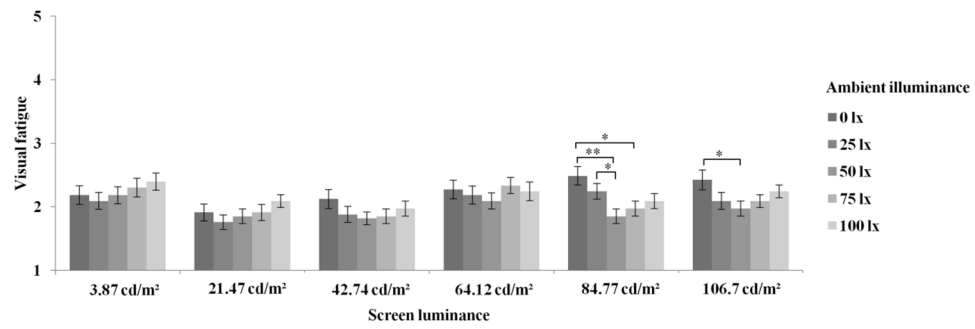

**Figure S3.** Subjective ratings of visual fatigue under ambient illuminance with different screen luminance conditions. Error bars indicate  $\pm 1$  standard error of the mean. \*\*  $p < .01$ , \*  $p < .05$ .
